# Supplementary material for: Ultralow thermal conductivity in the quaternary semiconducting chalcogenide Cs4[Ho26Cd7Se48] with an unprecedented closed cavity architecture
Source: Royal Society of Chemistry journal article supplement (doi:10.1039/d0qi01240h), 2020-12-08
Supplement: d0qi01240h1.pdf [file d0qi01240h1.pdf]

## *Electronic Supplementary Information*

# **Ultralow thermal conductivity in the quaternary semiconducting chalcogenide $\text{Cs}_4[\text{Ho}_{26}\text{Cd}_7\text{Se}_{48}]$ with an unprecedented closed cavity architecture**

Hong Chen,<sup>a,b</sup> Peng-Fei Liu,<sup>c</sup> Hua Lin,<sup>\*,a,b</sup> and Xin-Tao Wu<sup>\*,a,b</sup>

<sup>a</sup> *State Key Laboratory of Structural Chemistry, Fujian Institute of Research on the Structure of Matter, Chinese Academy of Sciences, Fuzhou 350002, China*

<sup>b</sup> *Fujian Science & Technology Innovation Laboratory for Optoelectronic Information of China, Fuzhou 350002, China*

<sup>c</sup> *Spallation Neutron Source Science Center, Institute of High Energy Physics, Chinese Academy of Sciences, Dongguan 523803, China*

\*E-mail: [linhua@fjirsm.ac.cn](mailto:linhua@fjirsm.ac.cn) and [wxt@fjirsm.ac.cn](mailto:wxt@fjirsm.ac.cn).

## **Supporting Information Index**

### **1. Experimental Section**

1.1 Materials and Instruments

1.2 Synthesis

1.3 Crystal Structure Determinations

### **2. Computational Section**

### **3. Figures and Tables**

**Fig. S1** Coordination geometry of  $\text{Cs}_4[\text{Ho}_{26}\text{Cd}_7\text{Se}_{48}]$ .

**Fig. S2** Coordination geometry of Cs atom in the structure of  $\text{Cs}_4[\text{Ho}_{26}\text{Cd}_7\text{Se}_{48}]$  with Cs–Se distances marked.

**Fig. S3** Experimental (black) and simulated (red) powder XRD patterns of  $\text{Cs}_4[\text{Ho}_{26}\text{Cd}_7\text{Se}_{48}]$ .

**Fig. S4** EDX results of  $\text{Cs}_4[\text{Ho}_{26}\text{Cd}_7\text{Se}_{48}]$ .

**Fig. S5** TG diagram of  $\text{Cs}_4[\text{Ho}_{26}\text{Cd}_7\text{Se}_{48}]$ .

**Fig. S6** SEM image of the fractured surface obtained from the hot-pressed pellet of  $\text{Cs}_4[\text{Ho}_{26}\text{Cd}_7\text{Se}_{48}]$ .

## *Electronic Supplementary Information*

**Fig. S7** Calculated band structure of Cs<sub>4</sub>[Ho<sub>26</sub>Cd<sub>7</sub>Se<sub>48</sub>].

**Fig. S8** Electrical conductivity ( $\sigma$ ) as a function of temperature for Cs<sub>4</sub>[Ho<sub>26</sub>Cd<sub>7</sub>Se<sub>48</sub>] using a K2500-5RSLP Variable Temperature Hall Measurement system.

**Fig. S9** Temperature dependence of the atomic displacement parameter (ADP) values from 100 to 300 K for Cs<sub>4</sub>[Ho<sub>26</sub>Cd<sub>7</sub>Se<sub>48</sub>].

**Table S1.** Crystallographic data and refinement details for Cs<sub>4</sub>[RE<sub>26</sub>Cd<sub>7</sub>Se<sub>48</sub>] (RE = Ho, Er, Tm, and Lu).

**Table S2-1.** Atomic coordinates and equivalent isotropic displacement parameters of Cs<sub>4</sub>[Ho<sub>26</sub>Cd<sub>7</sub>Se<sub>48</sub>].

**Table S2-2.** Atomic coordinates and equivalent isotropic displacement parameters of Cs<sub>4</sub>[Er<sub>26</sub>Cd<sub>7</sub>Se<sub>48</sub>].

**Table S2-3.** Atomic coordinates and equivalent isotropic displacement parameters of Cs<sub>4</sub>[Tm<sub>26</sub>Cd<sub>7</sub>Se<sub>48</sub>].

**Table S2-4.** Atomic coordinates and equivalent isotropic displacement parameters of Cs<sub>4</sub>[Lu<sub>26</sub>Cd<sub>7</sub>Se<sub>48</sub>].

**Table S3.** Selected bond lengths (Å) of Cs<sub>4</sub>[RE<sub>26</sub>Cd<sub>7</sub>Se<sub>48</sub>] (RE = Ho, Er, Tm, and Lu).

**Table S4.** EDX results of Cs<sub>4</sub>[Tm<sub>26</sub>Cd<sub>7</sub>Se<sub>48</sub>].

### **4. References**

---

## **1. Experimental Section**

### **1.1 Materials and Instruments**

All of the chemicals were obtained from commercial sources and used without further purification. Chunks of Ho, Er, Tm, and Lu, (99.95%) were purchased from Huhhot Jinrui Rare Earth Co., Ltd. Granular Cd (99.99%) and Lumpy Se (99.99%) were purchased from Alfa Aesar, and powdery CsCl (99.9%) was

## ***Electronic Supplementary Information***

purchased from Sinopharm Chemical Reagent Co., Ltd. Powder X-ray diffraction (XRD) patterns were collected on a Rigaku Mini-Flex II powder diffractometer by using Cu-K $\alpha$  radiation ( $\lambda = 1.5416 \text{ \AA}$ ) at room temperature. Elemental analysis was carried out using a field emission scanning electron microscope (FESEM, JSM6700F) equipped with an energy dispersive X-ray (EDX) spectrometer (Oxford INCA). Diffuse-reflectance spectra were recorded at room temperature using an UV–Vis–NIR spectrometer (Perkin-Elmer Lambda 950). The reflectance spectrum of the BaSO $_4$  powder was collected as the baseline.<sup>1</sup> The thermal stability analyses were measured on a NETZSCH STA 449C simultaneous analyzer. The magnetic property was measured on a Quantum Design PPMS-9T magnetometer in the temperature range of 2–300 K. The thermal conductivity were measured by laser flash techniques with a Netzsch LFA 457 system and calculated using the formula  $\kappa = D \times C_p \times d$ , where  $D$  was the measured thermal diffusivity,  $C_p$  was the heat capacity estimated using the Dulong-Petit model ( $C_p = 3nR$ , where  $n$  is the number of atoms per formula unit and  $R$  is the gas constant) and  $d$  was the sample density.<sup>2</sup> The uncertainty of the thermal conductivity  $k$  is estimated to be within 5%, considering the uncertainties for  $D$ ,  $C_p$  and  $d$ . Electrical conductivity ( $\sigma$ ) was measured on a K2500-5RSLP Variable Temperature Hall Measurement System.

### **1.2 Syntheses**

**Cs $_4$ [RE $_{26}$ Cd $_7$ Se $_{48}$ ] (RE = Ho, Er, Tm, and Lu).** Reactants were stored in an Ar-filled glovebox with controlled oxygen and moisture levels below 0.1 ppm. These

## ***Electronic Supplementary Information***

compounds were obtained by a high-temperature solid-state method with CsCl, RE, Cd and Se as the raw materials. The reagents were mixed in a mole ratio of CsCl: RE: Cd: Se = 5:26:7:48, and then sealed in an evacuated silica tube and annealed in tube furnaces with controlled temperature. The mixture was heated to 1223 K at 10 K/h and maintained there for 4 days, followed by slow cooling to room temperature at 3 K/h. The reacting product was washed with deionized water and ethanol and dried in air. The yellowish brown granular crystals were obtained in the yields of 30–90% based on RE. The exact composition of the compound was established from the X-ray structure refinement. Semi-quantitative EDX analyses carried out on several single crystals revealed the presence of Cs, RE, Cd and Se in a ratio closes to the chemical formula of the title compounds. No other element was detected.

The as-synthesized polycrystalline samples were ground into a fine powder and hot-pressed pellets (at 723 K for 60 min under an axial compressive stress of 100 MPa in vacuum) with a theoretical density of more than 90% were used for thermal conductivity measurements.

### **1.3 Crystal Structure Determinations**

All data collections were performed on a Mercury 70 CCD diffractometer equipped with graphite-monochromated Mo  $K_{\alpha}$  radiation ( $\lambda = 0.71073 \text{ \AA}$ ) at 293 K. Absorption corrections were performed by the multi-scan method.<sup>3</sup> All structure were solved by the direct methods and refined by the full-matrix least-squares fitting on  $F^2$  by *SHELX-2014*.<sup>4</sup> For simplicity, take Cs<sub>4</sub>[Ho<sub>26</sub>Cd<sub>7</sub>Se<sub>48</sub>] for example, initially one Cs, twelve Se, and nine “M” metal sites were distinguished according to their bond

## ***Electronic Supplementary Information***

distances and coordination environments. For example, the coordination polyhedra around metal sites M1–8 are distorted octahedra with 6 Se atoms ( $d_{M-S} = 2.7354$ – $2.9570$  Å) and these sites are tentatively referred to as “Ho” atoms. While metal site M9 is 100% Cd and is coordinated with 4 Se atoms in a regular tetrahedron ( $d_{M-S} = 2.6501$  Å). After refinement the  $R$  values were  $R1 = 14.32\%$  and  $wR2 = 34.65\%$ . In a subsequent step the occupancy of the 8 “Ho” atoms was free refined ( $R1 = 7.22\%$ ,  $wR2 = 19.31\%$ ). Among them, the occupancy of four sites was almost unchanged, that is close to 100%, while for the remaining four sites, the occupancy dropped to less than 0.5 (full theoretical occupancy). According to the EDX results, Ho and Cd were constrained to share the same crystallographic site and freely refined their occupancies by using “EXYZ” and “EADP” commands in these four sites. The formula at that point was  $Cs_4[Ho_{26.03}Cd_{6.97}Se_{48}]$ ; however, for charge balancing purposes the compound should have the general formula  $Cs_4[Ho_{26}Cd_7Se_{48}]$ , which is agreement with the EDX data. All atoms were refined anisotropically ( $R1 = 5.31\%$ ,  $wR2 = 12.65\%$ ). Crystallographic data and structural refinement details were summarized in Table S1, the positional coordinates and isotropic equivalent thermal parameters were given in Table S2, and some important bond distances were listed in Table S3.

## **2. Computational Section**

The geometry optimization, band structure and density of states (DOS) were calculated by the *Vienna ab initio simulation package* (VASP).<sup>5</sup> The generalized

### ***Electronic Supplementary Information***

gradient approximation (GGA)<sup>6</sup> was chosen as the exchange–correlation functional and a plane wave basis with the projector augmented wave (PAW)<sup>7,8</sup> potentials was used. The plane-wave cut-off energy of 500 eV, and a threshold of  $10^{-6}$  eV were set for the self-consistent-field convergence of the total electronic energy. The Fermi level ( $E_F = 0$  eV) was selected as the reference of the energy. The 4f electrons of the Ho element were treated as core electrons.

*Electronic Supplementary Information*

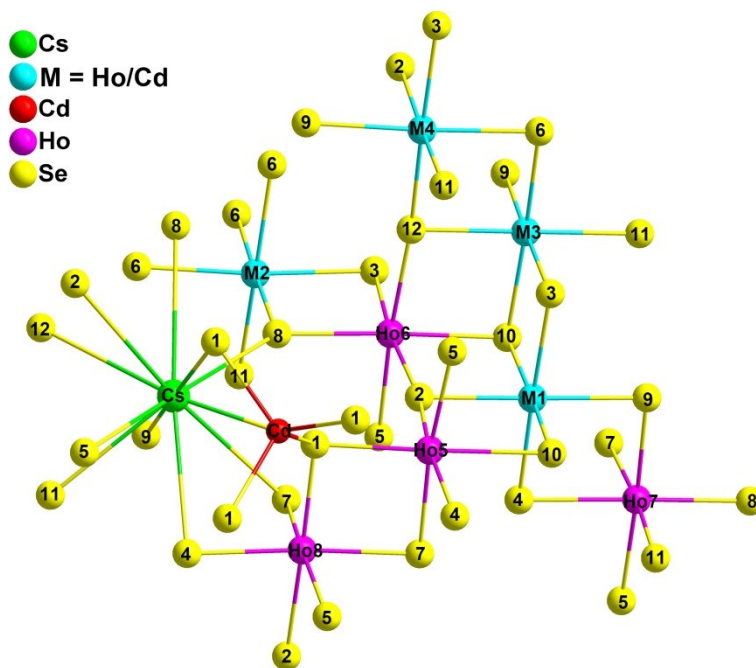

**Fig. S1** Coordination geometry of Cs<sub>4</sub>[Ho<sub>26</sub>Cd<sub>7</sub>Se<sub>48</sub>].

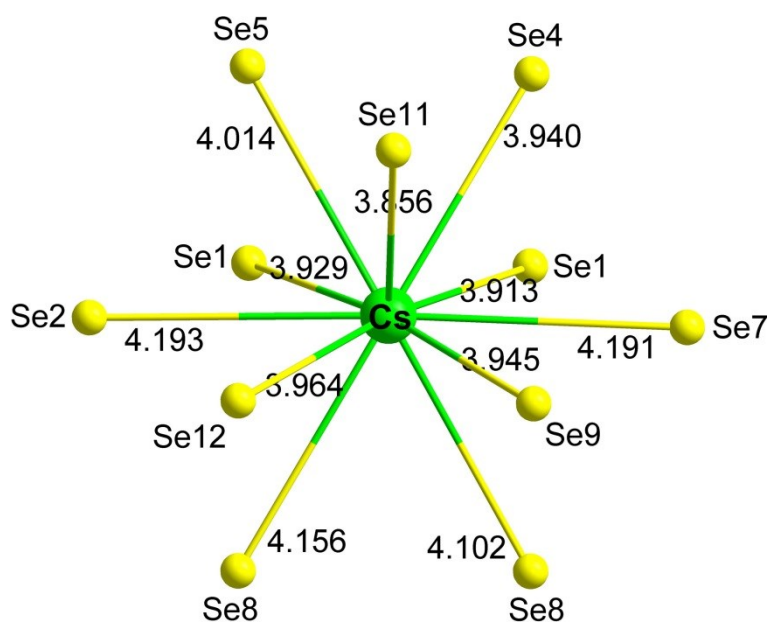

**Fig. S2** Coordination geometry of Cs atom in the structure of Cs<sub>4</sub>[Ho<sub>26</sub>Cd<sub>7</sub>Se<sub>48</sub>] with Cs-Se distances marked.

*Electronic Supplementary Information*

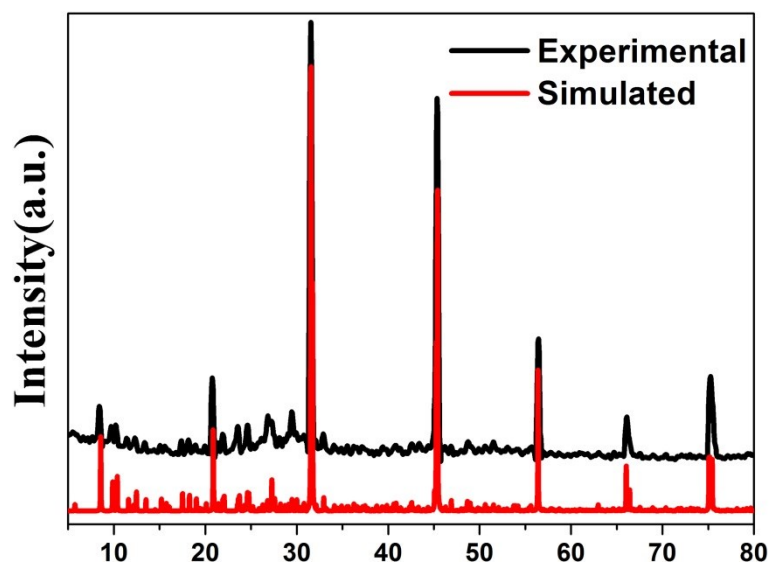

**Fig. S3** Experimental (black) and simulated (red) powder XRD patterns of  $\text{Cs}_4[\text{Ho}_{26}\text{Cd}_7\text{Se}_{48}]$ .

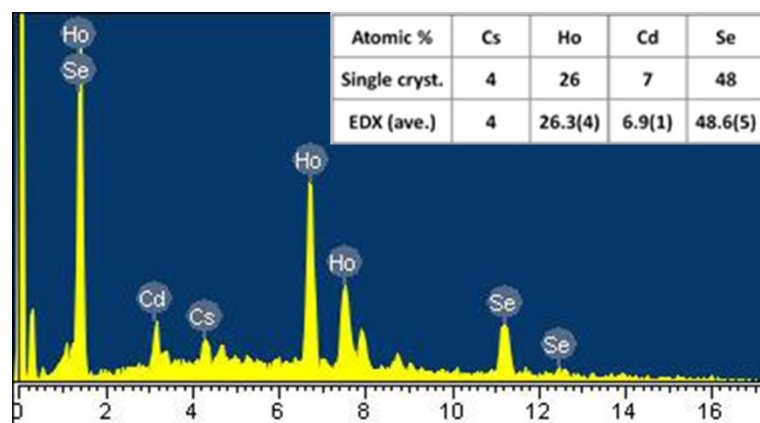

**Fig. S4** EDX results of  $\text{Cs}_4[\text{Ho}_{26}\text{Cd}_7\text{Se}_{48}]$ .



*Electronic Supplementary Information*

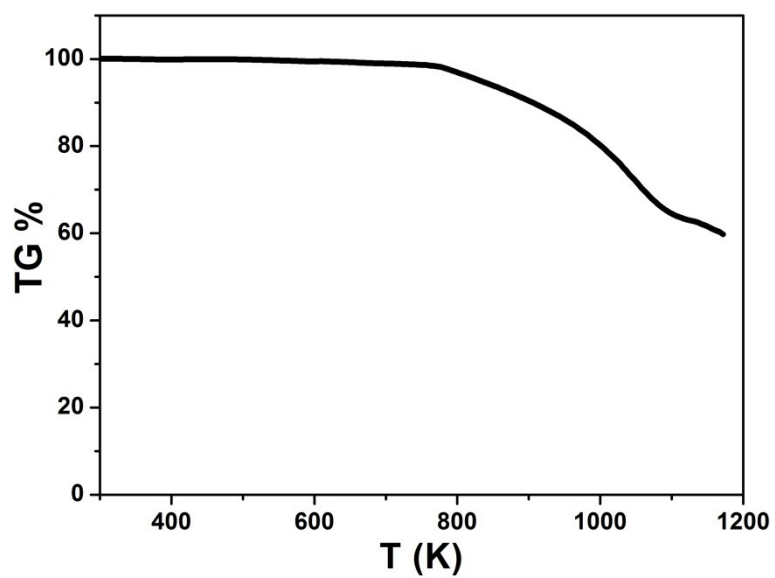

**Fig. S5** TG diagram of Cs<sub>4</sub>[Ho<sub>26</sub>Cd<sub>7</sub>Se<sub>48</sub>].

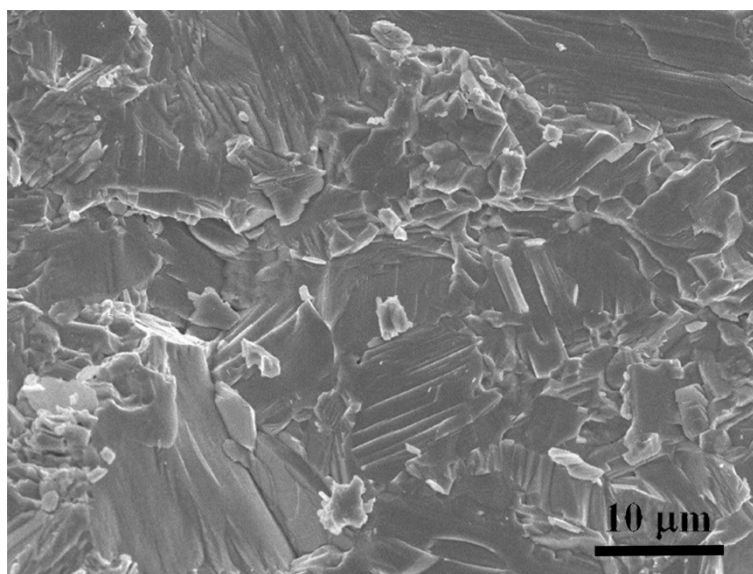

**Fig. S6** SEM image of the fractured surface obtained from the hot-pressed pellet of Cs<sub>4</sub>[Ho<sub>26</sub>Cd<sub>7</sub>Se<sub>48</sub>].

*Electronic Supplementary Information*

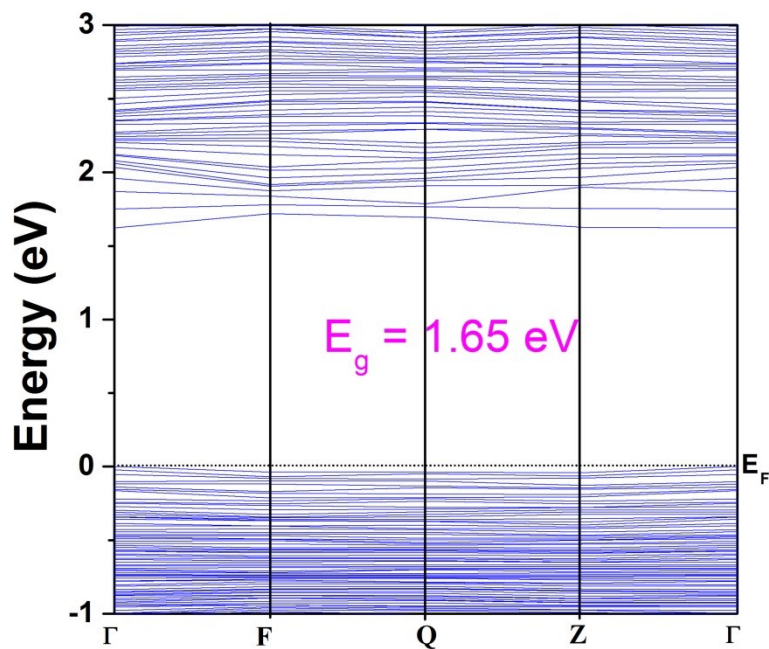

**Fig. S7** Calculated band structure of Cs<sub>4</sub>[Ho<sub>26</sub>Cd<sub>7</sub>Se<sub>48</sub>].

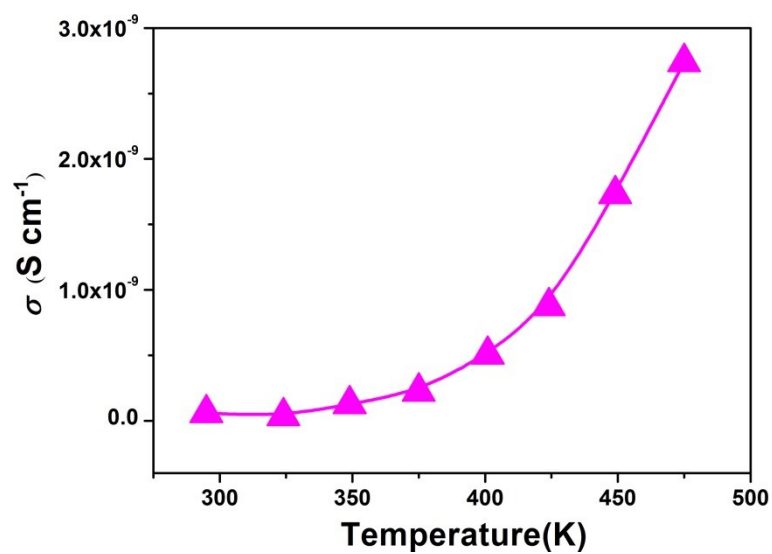

**Fig. S8** Electrical conductivity ( $\sigma$ ) as a function of temperature for Cs<sub>4</sub>[Ho<sub>26</sub>Cd<sub>7</sub>Se<sub>48</sub>] using a K2500-5RSLP Variable Temperature Hall Measurement system.

*Electronic Supplementary Information*

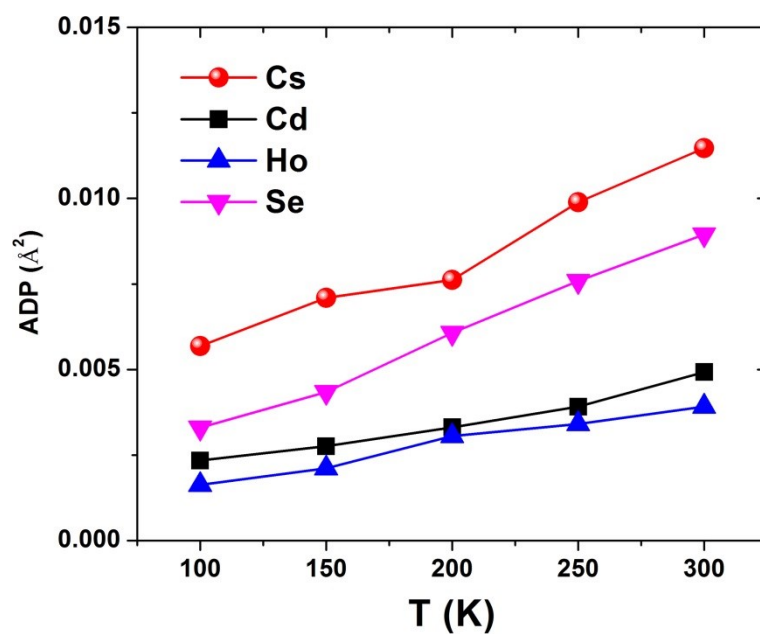

**Fig. S9** Temperature dependence of the atomic displacement parameter (ADP) values from 100 to 300 K for  $\text{Cs}_4[\text{Ho}_{26}\text{Cd}_7\text{Se}_{48}]$ . The largest ADP of Cs in  $\text{Cs}_4[\text{Ho}_{26}\text{Cd}_7\text{Se}_{48}]$  is regarded as an evidence of rattling mode.

## *Electronic Supplementary Information*

**Table S1.** Crystallographic data and refinement details for Cs<sub>4</sub>[RE<sub>26</sub>Cd<sub>7</sub>Se<sub>48</sub>] (RE = Ho, Er, Tm, and Lu).

| Formula                                                       | Cs <sub>4</sub> [Ho <sub>26</sub> Cd <sub>7</sub> Se <sub>48</sub> ] | Cs <sub>4</sub> [Er <sub>26</sub> Cd <sub>7</sub> Se <sub>48</sub> ] | Cs <sub>4</sub> [Tm <sub>26</sub> Cd <sub>7</sub> Se <sub>48</sub> ] | Cs <sub>4</sub> [Lu <sub>26</sub> Cd <sub>7</sub> Se <sub>48</sub> ] |
|---------------------------------------------------------------|----------------------------------------------------------------------|----------------------------------------------------------------------|----------------------------------------------------------------------|----------------------------------------------------------------------|
| Fw                                                            | 9396.70                                                              | 9457.28                                                              | 9500.70                                                              | 9657.74                                                              |
| Temperature(K)                                                | 293(2)                                                               |                                                                      |                                                                      |                                                                      |
| Crystal system                                                | tetragonal                                                           |                                                                      |                                                                      |                                                                      |
| Space group                                                   | <i>I</i> 4 <sub>1</sub> / <i>a</i> (No. 88)                          |                                                                      |                                                                      |                                                                      |
| <i>a</i> (Å)                                                  | 20.667(7)                                                            | 20.513(5)                                                            | 20.5073(3)                                                           | 20.3890(8)                                                           |
| <i>b</i> (Å)                                                  | 20.667(7)                                                            | 20.513(5)                                                            | 20.5073(3)                                                           | 20.3890(8)                                                           |
| <i>c</i> (Å)                                                  | 22.816(10)                                                           | 22.655(7)                                                            | 22.6556(5)                                                           | 22.4797(14)                                                          |
| $\alpha$ (deg.)                                               | 90                                                                   | 90                                                                   | 90                                                                   | 90                                                                   |
| $\beta$ (deg.)                                                | 90                                                                   | 90                                                                   | 90                                                                   | 90                                                                   |
| $\gamma$ (deg.)                                               | 90                                                                   | 90                                                                   | 90                                                                   | 90                                                                   |
| <i>V</i> (Å <sup>3</sup> )                                    | 9746(8)                                                              | 9533(6)                                                              | 9527.8(3)                                                            | 9345.1(9)                                                            |
| <i>Z</i>                                                      | 4                                                                    |                                                                      |                                                                      |                                                                      |
| <i>D<sub>c</sub></i> (g cm <sup>-3</sup> )                    | 6.40                                                                 | 6.59                                                                 | 6.62                                                                 | 6.86                                                                 |
| $\mu$ (mm <sup>-1</sup> )                                     | 41.7                                                                 | 43.9                                                                 | 45.3                                                                 | 48.9                                                                 |
| GOOF on <i>F</i> <sup>2</sup>                                 | 1.082                                                                | 1.047                                                                | 1.085                                                                | 1.033                                                                |
| R <sub>1</sub> , wR <sub>2</sub> ( <i>I</i> > 2σ( <i>I</i> )) | 0.0531, 0.1264                                                       | 0.0392, 0.1034                                                       | 0.0298, 0.0655                                                       | 0.0384, 0.0881                                                       |
| R <sub>1</sub> , wR <sub>2</sub> (all data)                   | 0.0605, 0.1323                                                       | 0.0461, 0.1088                                                       | 0.0384, 0.0681                                                       | 0.0474, 0.0939                                                       |
| diff peak, hole (e. Å <sup>-3</sup> )                         | 4.13, -3.51                                                          | 2.53, -2.91                                                          | 3.18, -3.68                                                          | 2.60, -3.28                                                          |

## *Electronic Supplementary Information*

**Table S2-1.** Atomic coordinates and equivalent isotropic displacement parameters of Cs<sub>4</sub>[Ho<sub>26</sub>Cd<sub>7</sub>Se<sub>48</sub>].

| Atom         | <i>Wyck.</i> | <i>x</i>   | <i>y</i>    | <i>z</i>    | $U_{\text{(eq)}}(\text{\AA}^2)^*$ | Occu.           |
|--------------|--------------|------------|-------------|-------------|-----------------------------------|-----------------|
| Cs           | 16 <i>f</i>  | 0.60738(6) | 0.22805(6)  | 0.06400(6)  | 0.0401(3)                         | 1.0             |
| M1 = Ho1/Cd1 | 16 <i>f</i>  | 0.25148(3) | -0.00261(4) | 0.06184(3)  | 0.0151(2)                         | 0.67(2)/0.33(2) |
| M2 = Ho2/Cd2 | 16 <i>f</i>  | 0.48323(4) | 0.15484(4)  | 0.30693(4)  | 0.0152(2)                         | 0.45(2)/0.55(2) |
| M3 = Ho3/Cd3 | 16 <i>f</i>  | 0.17344(4) | 0.11513(4)  | 0.18813(4)  | 0.0169(2)                         | 0.57(2)/0.43(2) |
| M4 = Ho4/Cd4 | 16 <i>f</i>  | 0.21430(3) | 0.30653(3)  | 0.18540(3)  | 0.01009(19)                       | 0.91(2)/0.09(2) |
| Cd5          | 4 <i>b</i>   | 0.5        | 0.25        | -0.1250     | 0.0217(5)                         | 1.0             |
| Ho5          | 16 <i>f</i>  | 0.36959(3) | 0.08510(3)  | -0.06035(3) | 0.00868(18)                       | 1.0             |
| Ho6          | 16 <i>f</i>  | 0.36953(3) | 0.08102(3)  | 0.18487(3)  | 0.00931(18)                       | 1.0             |
| Ho7          | 16 <i>f</i>  | 0.20953(3) | -0.19241(3) | 0.06306(3)  | 0.00777(18)                       | 1.0             |
| Ho8          | 16 <i>f</i>  | 0.55691(3) | 0.04598(3)  | -0.06000(3) | 0.00744(17)                       | 1.0             |
| Se1          | 16 <i>f</i>  | 0.48161(6) | 0.15639(6)  | -0.04669(7) | 0.0145(3)                         | 1.0             |
| Se2          | 16 <i>f</i>  | 0.36338(6) | 0.07120(6)  | 0.06149(6)  | 0.0102(3)                         | 1.0             |
| Se3          | 16 <i>f</i>  | 0.16998(6) | 0.11342(6)  | 0.06030(6)  | 0.0090(3)                         | 1.0             |
| Se4          | 16 <i>f</i>  | 0.32684(6) | -0.11809(6) | 0.06384(6)  | 0.0116(3)                         | 1.0             |
| Se5          | 16 <i>f</i>  | 0.28635(6) | 0.19357(6)  | -0.06516(5) | 0.0074(3)                         | 1.0             |
| Se6          | 16 <i>f</i>  | 0.48174(6) | 0.15179(6)  | 0.43211(7)  | 0.0113(3)                         | 1.0             |
| Se7          | 16 <i>f</i>  | 0.44193(6) | -0.03120(6) | -0.06366(5) | 0.0068(3)                         | 1.0             |
| Se8          | 16 <i>f</i>  | 0.48252(6) | 0.15236(6)  | 0.18608(6)  | 0.0136(4)                         | 1.0             |
| Se9          | 16 <i>f</i>  | 0.13744(6) | -0.07560(6) | 0.06232(6)  | 0.0123(3)                         | 1.0             |
| Se10         | 16 <i>f</i>  | 0.25584(6) | 0.00065(6)  | 0.18624(5)  | 0.0089(3)                         | 1.0             |
| Se11         | 16 <i>f</i>  | 0.56131(6) | 0.03985(6)  | 0.31162(6)  | 0.0129(3)                         | 1.0             |
| Se12         | 16 <i>f</i>  | 0.28603(6) | 0.19104(6)  | 0.18849(6)  | 0.0105(3)                         | 1.0             |

\* $U_{\text{(eq)}}$  is defined as one-third of the trace of the orthogonalized  $U_{ij}$  tensor.

## *Electronic Supplementary Information*

**Table S2-2.** Atomic coordinates and equivalent isotropic displacement parameters of Cs<sub>4</sub>[Er<sub>26</sub>Cd<sub>7</sub>Se<sub>48</sub>].

| Atom          | <i>Wyck.</i> | <i>x</i>   | <i>y</i>    | <i>z</i>    | $U_{(eq)}(\text{Å}^2)^*$ | Occu.           |
|---------------|--------------|------------|-------------|-------------|--------------------------|-----------------|
| Cs            | 16 <i>f</i>  | 0.02174(4) | 0.14323(4)  | 0.31413(4)  | 0.0331(3)                | 1.0             |
| M1 = Er1/Cd1  | 16 <i>f</i>  | 0.24732(3) | 0.00135(3)  | 0.18715(2)  | 0.01132(17)              | 0.71(2)/0.29(2) |
| M2 = Er2/ Cd2 | 16 <i>f</i>  | 0.09507(3) | 0.26707(3)  | 0.55739(3)  | 0.00879(18)              | 0.31(2)/0.69(2) |
| M3 = Er3/ Cd3 | 16 <i>f</i>  | 0.13468(3) | 0.07709(3)  | 0.56142(2)  | 0.01133(16)              | 0.62(2)/0.38(2) |
| M4 = Er4/ Cd4 | 16 <i>f</i>  | 0.05651(2) | -0.03571(2) | 0.43490(2)  | 0.00643(15)              | 0.90(2)/0.10(2) |
| Cd5           | 4 <i>b</i>   | 0          | 0.25        | 0.1250      | 0.0140(3)                | 1.0             |
| Er5           | 16 <i>f</i>  | 0.13019(2) | 0.08478(2)  | 0.06004(2)  | 0.00446(14)              | 1.0             |
| Er6           | 16 <i>f</i>  | 0.33092(2) | 0.11946(2)  | 0.06439(2)  | 0.00565(14)              | 1.0             |
| Er7           | 16 <i>f</i>  | 0.29027(2) | 0.30739(2)  | 0.06307(2)  | 0.00420(14)              | 1.0             |
| Er8           | 16 <i>f</i>  | 0.20439(2) | 0.19313(2)  | 0.18965(2)  | 0.00366(14)              | 1.0             |
| Se1           | 16 <i>f</i>  | 0.01830(5) | 0.15593(5)  | 0.04645(6)  | 0.0092(2)                | 1.0             |
| Se2           | 16 <i>f</i>  | 0.32118(5) | 0.11347(5)  | 0.18740(4)  | 0.0069(3)                | 1.0             |
| Se3           | 16 <i>f</i>  | 0.32986(5) | 0.11324(5)  | -0.06168(4) | 0.0073(3)                | 1.0             |
| Se4           | 16 <i>f</i>  | 0.13185(5) | 0.07699(5)  | 0.18492(4)  | 0.0083(3)                | 1.0             |
| Se5           | 16 <i>f</i>  | 0.21346(5) | 0.19319(5)  | 0.06447(4)  | 0.0050(3)                | 1.0             |
| Se6           | 16 <i>f</i>  | 0.01816(5) | 0.15156(5)  | 0.56694(5)  | 0.0093(3)                | 1.0             |
| Se7           | 16 <i>f</i>  | 0.21853(5) | 0.19187(5)  | 0.31299(4)  | 0.0046(2)                | 1.0             |
| Se8           | 16 <i>f</i>  | 0.40208(5) | 0.23243(5)  | 0.06493(5)  | 0.0127(3)                | 1.0             |
| Se9           | 16 <i>f</i>  | 0.13725(5) | 0.07606(5)  | 0.43656(4)  | 0.0090(3)                | 1.0             |
| Se10          | 16 <i>f</i>  | 0.25068(5) | 0.00568(5)  | 0.06196(4)  | 0.0063(3)                | 1.0             |
| Se11          | 16 <i>f</i>  | 0.21054(5) | 0.18923(5)  | 0.56092(4)  | 0.0096(3)                | 1.0             |
| Se12          | 16 <i>f</i>  | 0.44106(5) | 0.03645(5)  | 0.06055(4)  | 0.0078(3)                | 1.0             |

\* $U_{(eq)}$  is defined as one-third of the trace of the orthogonalized  $U_{ij}$  tensor.

## *Electronic Supplementary Information*

**Table S2-3.** Atomic coordinates and equivalent isotropic displacement parameters of Cs<sub>4</sub>[Tm<sub>26</sub>Cd<sub>7</sub>Se<sub>48</sub>].

| Atom         | <i>Wyck.</i> | <i>x</i>   | <i>y</i>    | <i>z</i>    | $U_{(eq)}(\text{Å}^2)^*$ | Occu.           |
|--------------|--------------|------------|-------------|-------------|--------------------------|-----------------|
| Cs           | 16 <i>f</i>  | 0.02180(3) | 0.14323(3)  | 0.31405(3)  | 0.03329(15)              | 1.0             |
| M1 = Tm1/Cd1 | 16 <i>f</i>  | 0.24733(2) | 0.00129(2)  | 0.18707(2)  | 0.01273(9)               | 0.70(2)/0.30(2) |
| M2 = Tm2/Cd2 | 16 <i>f</i>  | 0.09494(2) | 0.26708(2)  | 0.55748(2)  | 0.01074(10)              | 0.33(2)/0.67(2) |
| M3 = Tm3/Cd3 | 16 <i>f</i>  | 0.13469(2) | 0.07717(2)  | 0.56152(2)  | 0.01226(9)               | 0.63(2)/0.37(2) |
| M4 = Tm4/Cd4 | 16 <i>f</i>  | 0.05647(2) | -0.03574(2) | 0.43481(2)  | 0.00801(8)               | 0.90(2)/0.10(2) |
| Cd5          | 4 <i>b</i>   | 0          | 0.25        | 0.1250      | 0.0145(2)                | 1.0             |
| Tm5          | 16 <i>f</i>  | 0.13023(2) | 0.08477(2)  | 0.06000(2)  | 0.00659(7)               | 1.0             |
| Tm6          | 16 <i>f</i>  | 0.33097(2) | 0.11947(2)  | 0.06439(2)  | 0.00766(8)               | 1.0             |
| Tm7          | 16 <i>f</i>  | 0.29027(2) | 0.30739(2)  | 0.06306(2)  | 0.00616(7)               | 1.0             |
| Tm8          | 16 <i>f</i>  | 0.20446(2) | 0.19313(2)  | 0.18965(2)  | 0.00569(7)               | 1.0             |
| Se1          | 16 <i>f</i>  | 0.01842(3) | 0.15597(3)  | 0.04651(3)  | 0.01009(14)              | 1.0             |
| Se2          | 16 <i>f</i>  | 0.32121(3) | 0.11345(3)  | 0.18737(3)  | 0.00753(14)              | 1.0             |
| Se3          | 16 <i>f</i>  | 0.32989(3) | 0.11326(3)  | -0.06174(3) | 0.00700(15)              | 1.0             |
| Se4          | 16 <i>f</i>  | 0.13190(3) | 0.07696(3)  | 0.18490(3)  | 0.00923(15)              | 1.0             |
| Se5          | 16 <i>f</i>  | 0.21350(3) | 0.19317(3)  | 0.06448(3)  | 0.00559(13)              | 1.0             |
| Se6          | 16 <i>f</i>  | 0.01825(3) | 0.15151(3)  | 0.56679(3)  | 0.00999(15)              | 1.0             |
| Se7          | 16 <i>f</i>  | 0.21849(3) | 0.19184(3)  | 0.31309(3)  | 0.00540(13)              | 1.0             |
| Se8          | 16 <i>f</i>  | 0.40205(3) | 0.23237(3)  | 0.06507(3)  | 0.01320(16)              | 1.0             |
| Se9          | 16 <i>f</i>  | 0.13735(3) | 0.07603(3)  | 0.43666(3)  | 0.00947(15)              | 1.0             |
| Se10         | 16 <i>f</i>  | 0.25079(3) | 0.00570(3)  | 0.06191(3)  | 0.00663(15)              | 1.0             |
| Se11         | 16 <i>f</i>  | 0.21055(3) | 0.18933(3)  | 0.56100(3)  | 0.01057(14)              | 1.0             |
| Se12         | 16 <i>f</i>  | 0.44115(3) | 0.03650(3)  | 0.06058(3)  | 0.00786(14)              | 1.0             |

\* $U_{(eq)}$  is defined as one-third of the trace of the orthogonalized  $U_{ij}$  tensor.

## *Electronic Supplementary Information*

**Table S2-4.** Atomic coordinates and equivalent isotropic displacement parameters of Cs<sub>4</sub>[Lu<sub>26</sub>Cd<sub>7</sub>Se<sub>48</sub>].

| Atom         | <i>Wyck.</i> | <i>x</i>   | <i>y</i>    | <i>z</i>    | $U_{(eq)}(\text{Å}^2)^*$ | Occu.           |
|--------------|--------------|------------|-------------|-------------|--------------------------|-----------------|
| Cs           | 16 <i>f</i>  | 0.60632(5) | 0.22841(5)  | 0.06440(4)  | 0.0301(2)                | 1.0             |
| M1 = Lu1/Cd1 | 16 <i>f</i>  | 0.25108(3) | -0.00270(3) | 0.06213(3)  | 0.01145(16)              | 0.73(2)/0.27(2) |
| M2 = Lu2/Cd2 | 16 <i>f</i>  | 0.48279(3) | 0.15514(3)  | 0.30762(3)  | 0.00852(17)              | 0.27(2)/0.73(2) |
| M3 = Lu3/Cd3 | 16 <i>f</i>  | 0.17247(3) | 0.11545(3)  | 0.18776(3)  | 0.01094(16)              | 0.67(2)/0.33(2) |
| M4 = Lu4/Cd4 | 16 <i>f</i>  | 0.21426(2) | 0.30639(2)  | 0.18505(2)  | 0.00843(14)              | 0.91(2)/0.09(2) |
| Cd5          | 4 <i>b</i>   | 0.5        | 0.25        | -0.1250     | 0.0132(4)                | 1.0             |
| Lu5          | 16 <i>f</i>  | 0.37002(2) | 0.08458(2)  | -0.06046(2) | 0.00599(13)              | 1.0             |
| Lu6          | 16 <i>f</i>  | 0.36928(2) | 0.08095(2)  | 0.18532(2)  | 0.00658(13)              | 1.0             |
| Lu7          | 16 <i>f</i>  | 0.20977(2) | -0.19278(2) | 0.06258(2)  | 0.00540(13)              | 1.0             |
| Lu8          | 16 <i>f</i>  | 0.55687(2) | 0.04519(2)  | -0.06028(2) | 0.00477(13)              | 1.0             |
| Se1          | 16 <i>f</i>  | 0.48172(6) | 0.15541(6)  | -0.04631(6) | 0.0095(3)                | 1.0             |
| Se2          | 16 <i>f</i>  | 0.36339(5) | 0.07141(6)  | 0.06170(5)  | 0.0065(3)                | 1.0             |
| Se3          | 16 <i>f</i>  | 0.17010(5) | 0.11319(5)  | 0.06071(5)  | 0.0062(3)                | 1.0             |
| Se4          | 16 <i>f</i>  | 0.32702(5) | -0.11801(6) | 0.06406(5)  | 0.0089(3)                | 1.0             |
| Se5          | 16 <i>f</i>  | 0.28656(5) | 0.19294(5)  | -0.06496(5) | 0.0046(2)                | 1.0             |
| Se6          | 16 <i>f</i>  | 0.48163(5) | 0.15148(6)  | 0.43365(5)  | 0.0095(3)                | 1.0             |
| Se7          | 16 <i>f</i>  | 0.44176(5) | -0.03170(5) | -0.06360(5) | 0.0042(2)                | 1.0             |
| Se8          | 16 <i>f</i>  | 0.48223(6) | 0.15209(6)  | 0.18396(6)  | 0.0125(3)                | 1.0             |
| Se9          | 16 <i>f</i>  | 0.13727(5) | -0.07642(5) | 0.06211(5)  | 0.0085(3)                | 1.0             |
| Se10         | 16 <i>f</i>  | 0.25532(5) | 0.00085(5)  | 0.18658(5)  | 0.0062(3)                | 1.0             |
| Se11         | 16 <i>f</i>  | 0.56006(6) | 0.03935(5)  | 0.31152(5)  | 0.0096(3)                | 1.0             |
| Se12         | 16 <i>f</i>  | 0.28662(5) | 0.19115(5)  | 0.18890(5)  | 0.0082(3)                | 1.0             |

\* $U_{(eq)}$  is defined as one-third of the trace of the orthogonalized  $U_{ij}$  tensor.



## *Electronic Supplementary Information*

**Table S3.** Selected bond lengths (Å) of Cs<sub>4</sub>[RE<sub>26</sub>Cd<sub>7</sub>Se<sub>48</sub>] (RE = Ho, Er, Tm, and Lu).

|          | Cs <sub>4</sub> [Ho <sub>26</sub> Cd <sub>7</sub> Se <sub>48</sub> ] | Cs <sub>4</sub> [Er <sub>26</sub> Cd <sub>7</sub> Se <sub>48</sub> ] | Cs <sub>4</sub> [Tm <sub>26</sub> Cd <sub>7</sub> Se <sub>48</sub> ] | Cs <sub>4</sub> [Lu <sub>26</sub> Cd <sub>7</sub> Se <sub>48</sub> ] |
|----------|----------------------------------------------------------------------|----------------------------------------------------------------------|----------------------------------------------------------------------|----------------------------------------------------------------------|
| M1–Se2   | 2.7705(18)                                                           | 2.7541(14)                                                           | 2.7544(7)                                                            | 2.7435(12)                                                           |
| M1–Se9   | 2.7984(18)                                                           | 2.7827(14)                                                           | 2.7790(7)                                                            | 2.7646(12)                                                           |
| M1–Se10  | 2.8406(18)                                                           | 2.8321(14)                                                           | 2.8307(7)                                                            | 2.7997(14)                                                           |
| M1–Se4   | 2.8504(18)                                                           | 2.8330(13)                                                           | 2.8338(8)                                                            | 2.8154(13)                                                           |
| M1–Se10  | 2.8714(18)                                                           | 2.8385(13)                                                           | 2.8380(8)                                                            | 2.8275(13)                                                           |
| M1–Se3   | 2.9305(18)                                                           | 2.9035(14)                                                           | 2.9025(7)                                                            | 2.8829(13)                                                           |
| M2–Se8   | 2.758(2)                                                             | 2.384(6)                                                             | 2.7772(8)                                                            | 2.7805(14)                                                           |
| M2–Se6   | 2.857(2)                                                             | 2.7716(15)                                                           | 2.8496(8)                                                            | 2.8343(14)                                                           |
| M2–Se6   | 2.8699(18)                                                           | 2.8482(16)                                                           | 2.8522(7)                                                            | 2.8352(13)                                                           |
| M2–Se11  | 2.8745(18)                                                           | 2.8549(14)                                                           | 2.8582(8)                                                            | 2.8396(13)                                                           |
| M2–Se6   | 2.8967(18)                                                           | 2.8578(14)                                                           | 2.8671(7)                                                            | 2.8489(13)                                                           |
| M2–Se3   | 2.9204(18)                                                           | 2.8683(14)                                                           | 2.8996(7)                                                            | 2.8817(13)                                                           |
| M3–Se11  | 3.9298(15)                                                           | 2.7773(13)                                                           | 2.7769(7)                                                            | 2.7677(12)                                                           |
| M3–Se12  | 3.9502(15)                                                           | 2.7998(13)                                                           | 2.8023(7)                                                            | 2.7929(12)                                                           |
| M3–Se9   | 2.7913(17)                                                           | 2.8294(14)                                                           | 2.8293(8)                                                            | 2.7962(13)                                                           |
| M3–Se6   | 2.8064(18)                                                           | 2.8394(13)                                                           | 2.8355(7)                                                            | 2.8094(13)                                                           |
| M3–Se3   | 2.834(2)                                                             | 2.8759(14)                                                           | 2.8724(7)                                                            | 2.8568(12)                                                           |
| M3–Se10  | 2.8714(18)                                                           | 2.9004(13)                                                           | 2.8988(7)                                                            | 2.8835(12)                                                           |
| M4–Se12  | 2.8106(17)                                                           | 2.7945(13)                                                           | 2.7927(6)                                                            | 2.7758(12)                                                           |
| M4–Se11  | 2.8272(19)                                                           | 2.8112(14)                                                           | 2.8075(7)                                                            | 2.7788(12)                                                           |
| M4–Se3   | 2.8440(17)                                                           | 2.8230(13)                                                           | 2.8219(7)                                                            | 2.8067(12)                                                           |
| M4–Se6   | 2.8443(17)                                                           | 2.8274(13)                                                           | 2.8259(7)                                                            | 2.8095(12)                                                           |
| M4–Se9   | 2.8550(17)                                                           | 2.8287(13)                                                           | 2.8297(7)                                                            | 2.8199(12)                                                           |
| M4–Se12  | 2.8778(19)                                                           | 2.8469(14)                                                           | 2.8498(7)                                                            | 2.8341(12)                                                           |
| RE5–Se1  | 2.7619(17)                                                           | 2.7374(12)                                                           | 2.7354(7)                                                            | 2.7155(12)                                                           |
| RE5–Se2  | 2.7978(18)                                                           | 2.7954(13)                                                           | 2.7951(7)                                                            | 2.7625(12)                                                           |
| RE5–Se7  | 2.8280(16)                                                           | 2.8058(12)                                                           | 2.8050(6)                                                            | 2.7866(11)                                                           |
| RE5–Se5  | 2.8317(17)                                                           | 2.8066(13)                                                           | 2.8064(7)                                                            | 2.7906(11)                                                           |
| RE5–Se4  | 2.8756(19)                                                           | 2.8338(14)                                                           | 2.8345(7)                                                            | 2.8253(12)                                                           |
| RE5–Se10 | 2.9775(17)                                                           | 2.9569(13)                                                           | 2.9570(6)                                                            | 2.9477(11)                                                           |
| RE6–Se8  | 2.7618(17)                                                           | 2.7389(13)                                                           | 2.7359(7)                                                            | 2.7218(12)                                                           |
| RE6–Se2  | 2.8251(18)                                                           | 2.7967(13)                                                           | 2.7961(7)                                                            | 2.7884(12)                                                           |
| RE6–Se12 | 2.8557(17)                                                           | 2.8305(13)                                                           | 2.8298(6)                                                            | 2.8098(12)                                                           |

### *Electronic Supplementary Information*

|             |            |            |           |            |
|-------------|------------|------------|-----------|------------|
| RE6–Se3     | 2.8648(19) | 2.8447(13) | 2.8439(6) | 2.8215(12) |
| RE6–Se5     | 2.8680(17) | 2.8565(13) | 2.8550(6) | 2.8278(11) |
| RE6–Se10    | 2.8777(17) | 2.8591(14) | 2.8604(7) | 2.8403(12) |
| RE7–Se8     | 2.7847(17) | 2.7617(13) | 2.7611(7) | 2.7470(12) |
| RE7–Se7     | 2.8193(18) | 2.8101(13) | 2.8115(7) | 2.7890(11) |
| RE7–Se11    | 2.8369(17) | 2.8137(13) | 2.8116(6) | 2.7904(12) |
| RE7–Se9     | 2.8416(16) | 2.8155(13) | 2.8140(7) | 2.7953(12) |
| RE7–Se5     | 2.8459(19) | 2.8232(12) | 2.8224(6) | 2.8078(11) |
| RE7–Se4     | 2.8701(17) | 2.8496(13) | 2.8488(7) | 2.8356(12) |
| RE8–Se1     | 2.7786(17) | 2.7564(12) | 2.7586(7) | 2.7380(12) |
| RE8–Se4     | 2.8286(17) | 2.8094(13) | 2.8109(7) | 2.7957(12) |
| RE8–Se7     | 2.8381(18) | 2.8110(13) | 2.8115(7) | 2.7985(11) |
| RE8–Se5     | 2.8552(18) | 2.8406(13) | 2.8399(6) | 2.8101(11) |
| RE8–Se7     | 2.8632(16) | 2.8422(13) | 2.8420(7) | 2.8235(11) |
| RE8–Se2     | 2.9292(17) | 2.9003(13) | 2.8992(7) | 2.8802(12) |
| Cd5–Se1 × 4 | 2.6608(16) | 2.6518(12) | 2.6501(7) | 2.6433(12) |
| Cs–Se11     | 3.858(2)   | 3.8327(16) | 3.8306(8) | 3.8139(14) |
| Cs–Se1      | 3.915(2)   | 3.8806(15) | 3.8806(8) | 3.8552(15) |
| Cs–Se1      | 3.933(2)   | 3.8995(16) | 3.8988(9) | 3.8766(15) |
| Cs–Se4      | 3.940(2)   | 3.9003(15) | 3.9027(9) | 3.8922(15) |
| Cs–Se9      | 3.947(2)   | 3.9391(16) | 3.9377(9) | 3.9055(15) |
| Cs–Se12     | 3.964(2)   | 3.9493(16) | 3.9489(8) | 3.9099(15) |
| Cs–Se5      | 4.017(2)   | 3.9842(15) | 3.9836(8) | 3.9746(14) |
| Cs–Se8      | 4.107(2)   | 4.0565(16) | 4.0555(9) | 4.0057(16) |
| Cs–Se8      | 4.162(2)   | 4.1086(16) | 4.1075(9) | 4.0522(16) |
| Cs–Se2      | 4.193(2)   | 4.1582(16) | 4.1549(8) | 4.1285(15) |
| Cs–Se7      | 4.194(2)   | 4.1592(17) | 4.1587(8) | 4.1287(14) |

---

**Electronic Supplementary Information**

**Table S4.** EDX results of Cs<sub>4</sub>[Tm<sub>26</sub>Cd<sub>7</sub>Se<sub>48</sub>].

| Crystal-1 |         |         |         | Crystal-2                                                                                               |         |         |         |
|-----------|---------|---------|---------|---------------------------------------------------------------------------------------------------------|---------|---------|---------|
| Element   | Weight% | Atomic% | Formula | Element                                                                                                 | Weight% | Atomic% | Formula |
| Se L      | 40.53   | 56.66   | 46.49   | Se L                                                                                                    | 40.36   | 56.50   | 48.70   |
| Cd L      | 8.27    | 8.12    | 6.66    | Cd L                                                                                                    | 8.41    | 8.27    | 7.13    |
| Cs L      | 5.87    | 4.87    | 4       | Cs L                                                                                                    | 5.58    | 4.64    | 4       |
| Ho L      | 45.33   | 30.34   | 24.89   | Ho L                                                                                                    | 45.65   | 30.59   | 26.37   |
| Total     | 100.00  |         |         | Total                                                                                                   | 100.00  |         |         |
| Crystal-3 |         |         |         | Crystal-4                                                                                               |         |         |         |
| Element   | Weight% | Atomic% | Formula | Element                                                                                                 | Weight% | Atomic% | Formula |
| Se L      | 40.88   | 57.05   | 56.64   | Se L                                                                                                    | 40.09   | 56.27   | 44.84   |
| Cd L      | 8.54    | 8.37    | 8.31    | Cd L                                                                                                    | 7.98    | 7.87    | 6.27    |
| Cs L      | 4.86    | 4.03    | 4       | Cs L                                                                                                    | 6.02    | 5.02    | 4       |
| Ho L      | 45.72   | 30.55   | 30.32   | Ho L                                                                                                    | 45.91   | 30.85   | 24.58   |
| Total     | 100.00  |         |         | Total                                                                                                   | 100.00  |         |         |
| Crystal-5 |         |         |         | Average formula:<br>Cs <sub>4</sub> Cd <sub>7.1 (2)</sub> Ho <sub>26.4 (2)</sub> Se <sub>48.9 (5)</sub> |         |         |         |
| Element   | Weight% | Atomic% | Formula |                                                                                                         |         |         |         |
| Se L      | 40.31   | 56.45   | 47.78   |                                                                                                         |         |         |         |
| Cd L      | 8.37    | 8.23    | 6.97    |                                                                                                         |         |         |         |
| Cs L      | 5.68    | 4.73    | 4       |                                                                                                         |         |         |         |
| Ho L      | 45.63   | 30.59   | 25.91   |                                                                                                         |         |         |         |
| Total     | 100.00  |         |         |                                                                                                         |         |         |         |

## *Electronic Supplementary Information*

### **References**

- [1] E. L. Simmons, Diffuse reflectance spectroscopy: a comparison of the theories. *Appl. Opt.*, 1975, **14**, 1380–1386.
- [2] K. A. Borup, J. D. Boor, H. Wang, F. Drymiotis, F. Gascoin, X. Shi, L. D. Chen, M. I. Fedorov, E. Müller, B. B. Iversen and G. J. Snyder, Measuring thermoelectric transport properties of materials. *Energy Environ. Sci.*, 2015, **8**, 423–435.
- [3] *CrystalClear* Version 1.3.5; Rigaku Corp.: Woodlands, TX, 1999.
- [4] G. M. Sheldrick, *Acta Crystallogr., Sect. A: Found. Crystallogr.* 2008, 112–122.
- [5] G. Kresse and J. Furthmüller, Efficient iterative schemes for ab initio total-energy calculations using a plane-wave basis set. *Phys. Rev. B: Condens. Matter*, 1996, **54**, 11169–11186.
- [6] J. P. Perdew and Y. Wang, Accurate and simple analytic representation of the electron-gas correlation energy. *Phys. Rev. B: Condens. Matter*, 1992, **45**, 13244–13249.
- [7] G. Kresse and D. Joubert, From ultrasoft pseudopotentials to the projector augmented-wave method. *Phys. Rev. B: Condens. Matter*, 1999, **59**, 1758–1775.
- [8] P. E. Blöchl, Projector augmented-wave method. *Phys. Rev. B: Condens. Matter*, 1994, **50**, 17953–17979.
